# Supplementary figures and images for: Microsecond interaural time difference discrimination restored by cochlear implants after neonatal deafness
Source: eLife journal article supplement (doi:10.7554/elife.59300), 2021-01-11

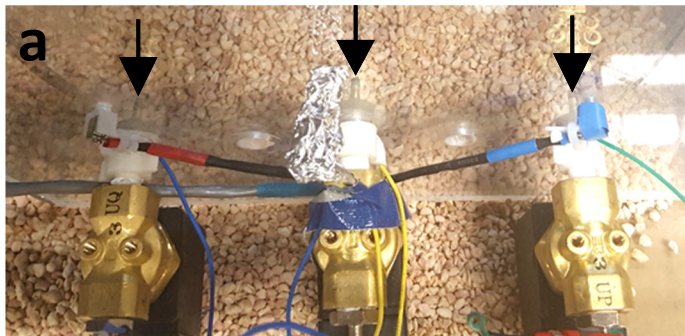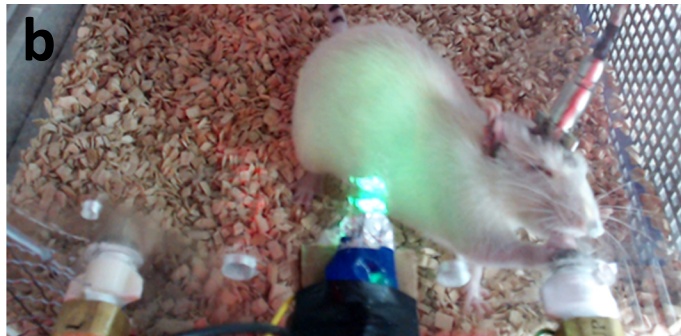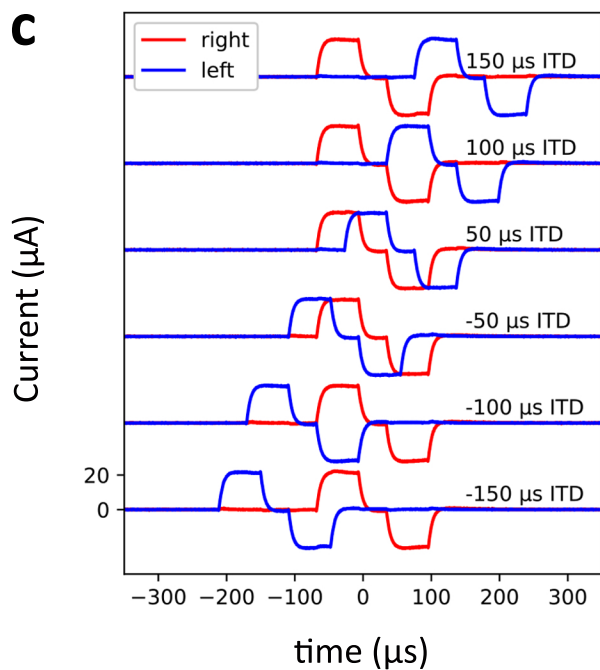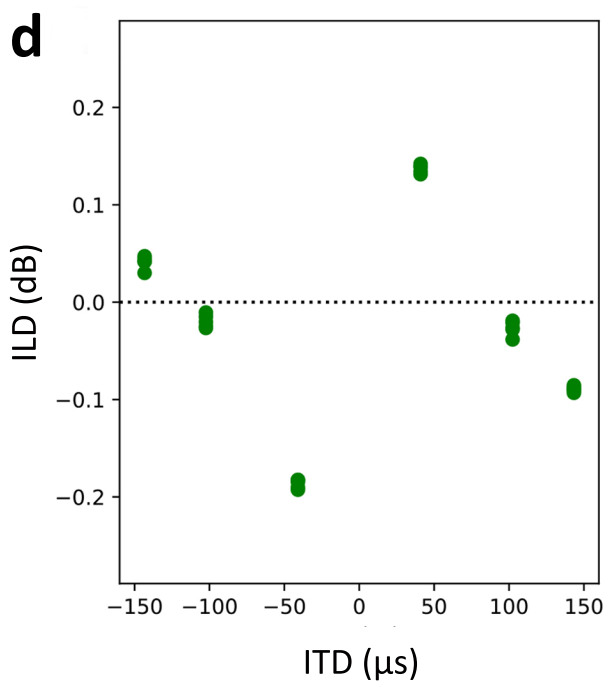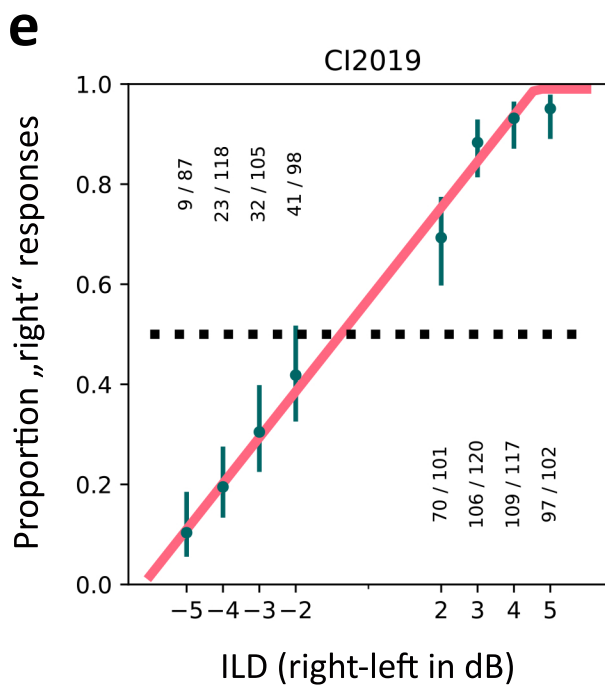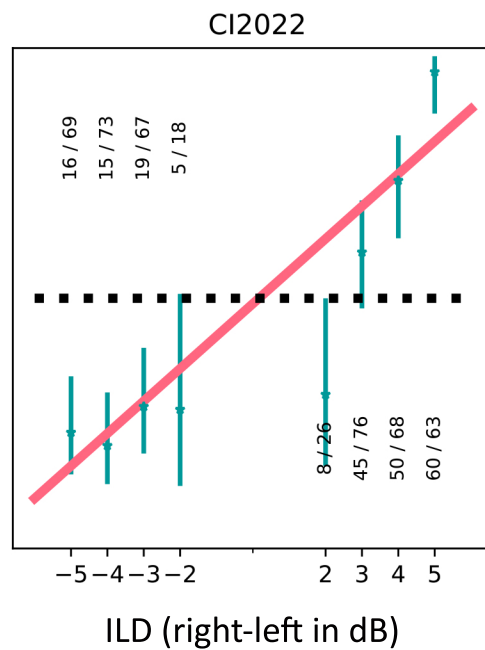

Supplement: supp [file elife-59300-supp-v1.zip]

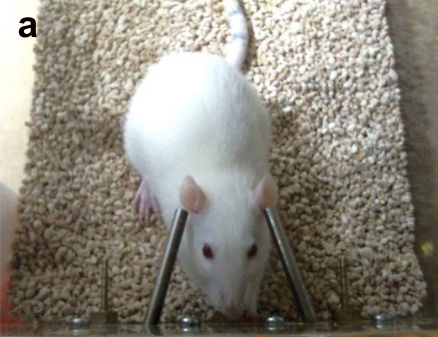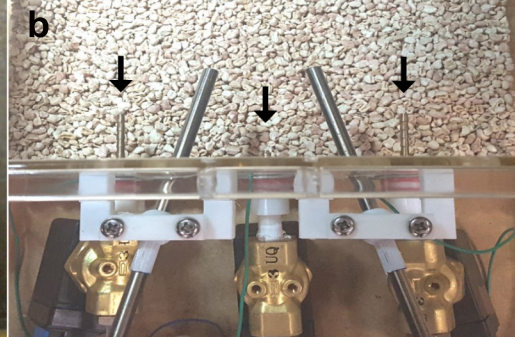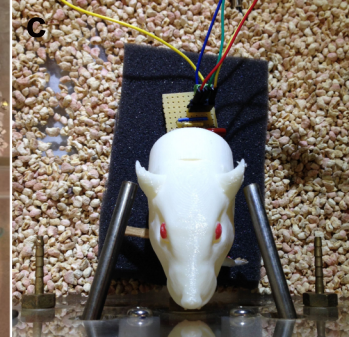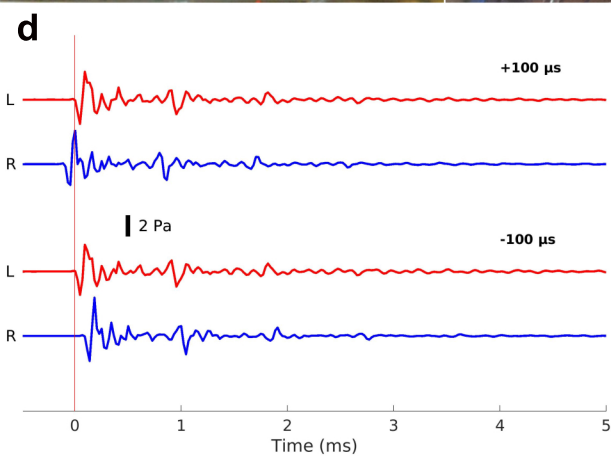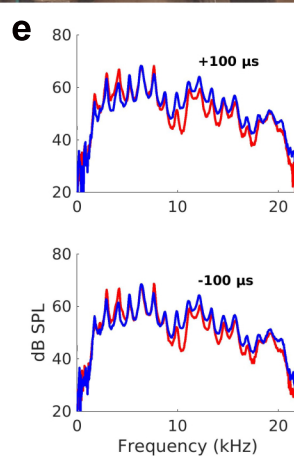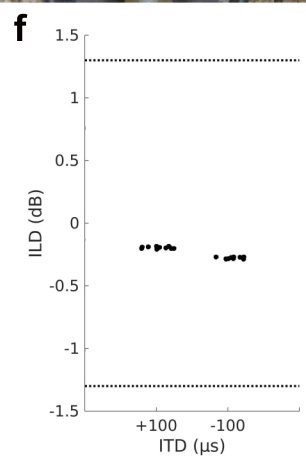

Supplement: supp [file elife-59300-supp-v1.zip]
